# Supplementary material for: Non-Invasive-Monitoring Methodology for the Evaluation of Environmental Impacts on Istrian Stone Surfaces in Venice
Source: MDPI journal article supplement (doi:10.3390/atmos13071036), 2022-06-29
Supplement: s1 [file s1]

# Non-invasive monitoring methodology for the evaluation of environmental impacts on Istrian stone surfaces in Venice

Margherita Gnemmi <sup>1</sup>, Laura Falchi <sup>1\*</sup> and Elisabetta Zendri<sup>1</sup>

<sup>1</sup> Ca Foscari University of Venice, Department of Environmental Sciences, Informatics, Statistics;  
laura.falchi@unive.it; elizen@unive.it

\* Correspondence: laura.falchi@unive.it; Tel.: +39 0412346732

## SUPPLEMENTARY MATERIALS

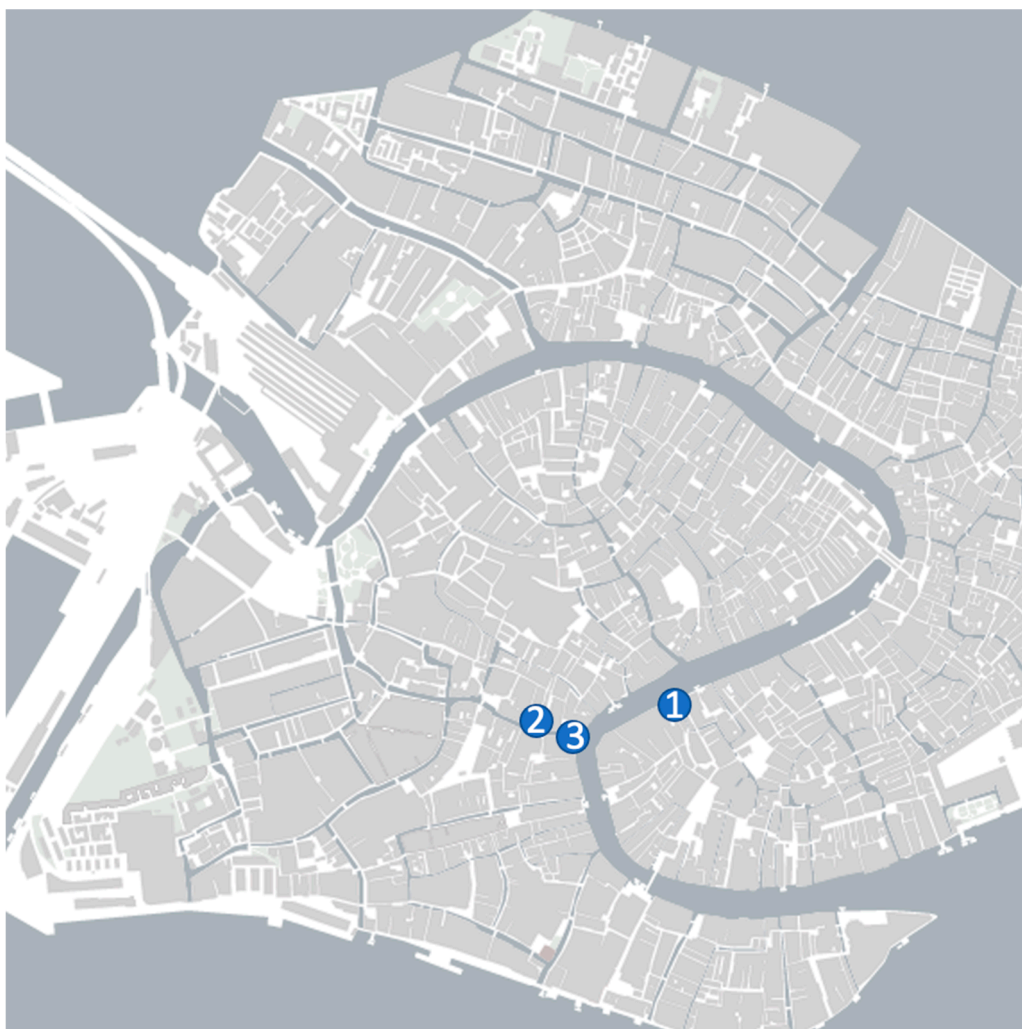

Figure S1: (a) Geographical location of the case studies: 1) Garzoni Palace; 2) Ca' Dolfin; 3) Ca' Foscari

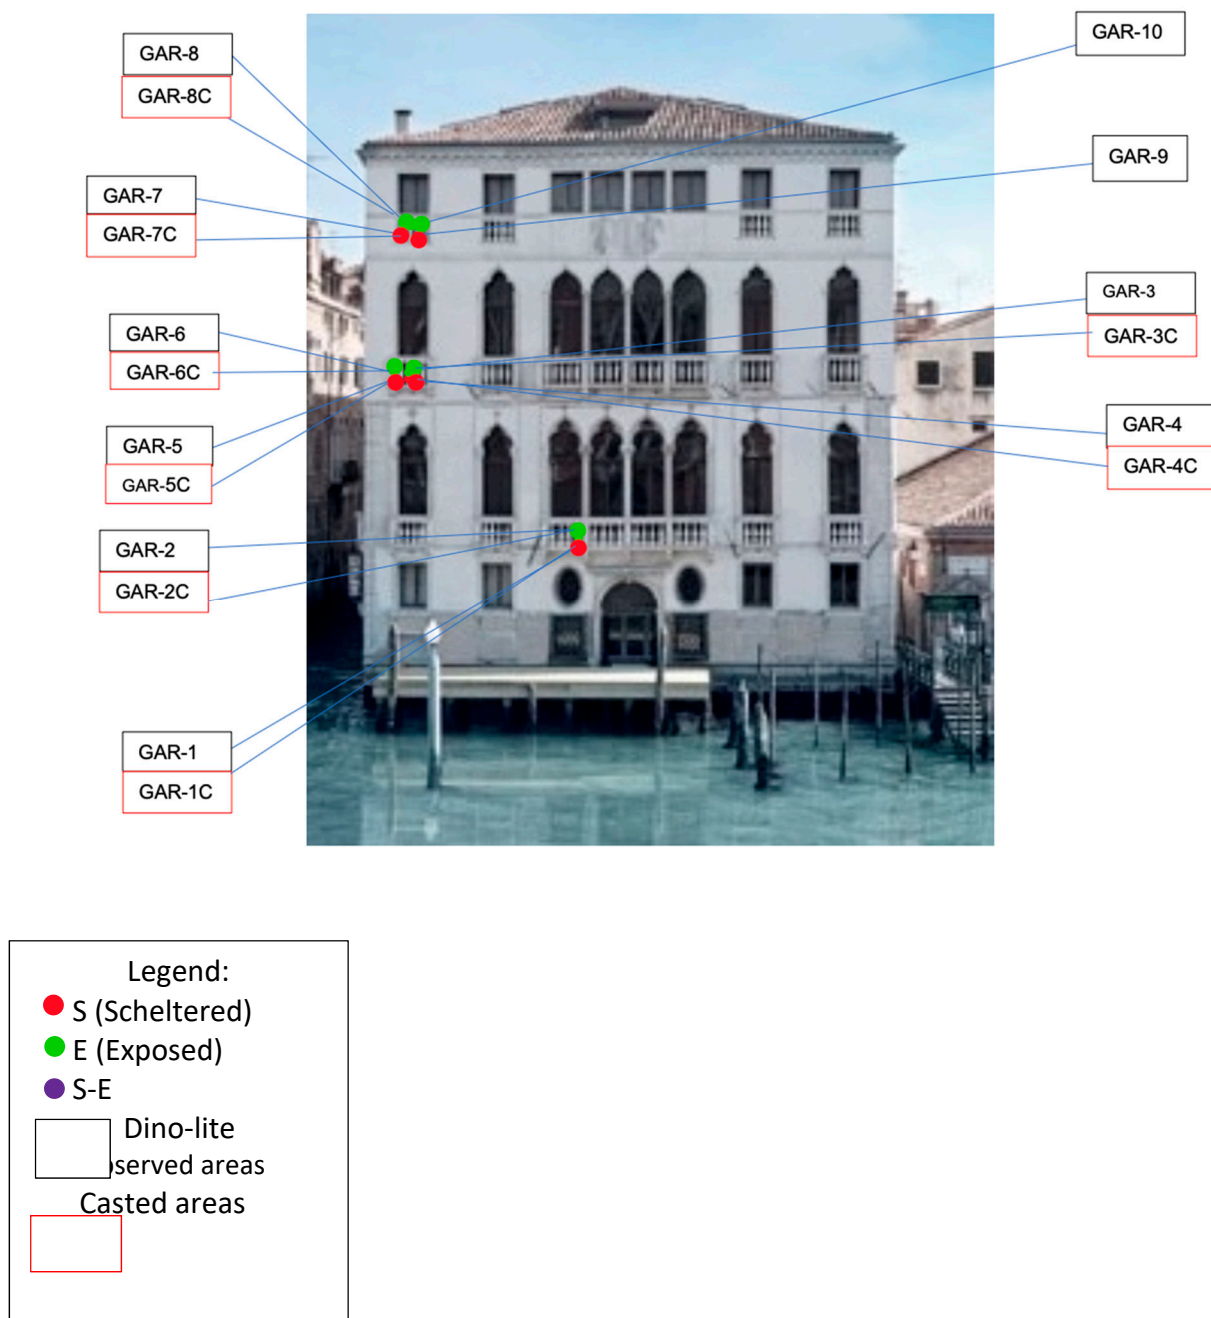

Figure S2: Sampling points for Garzoni Palace façade on the canal

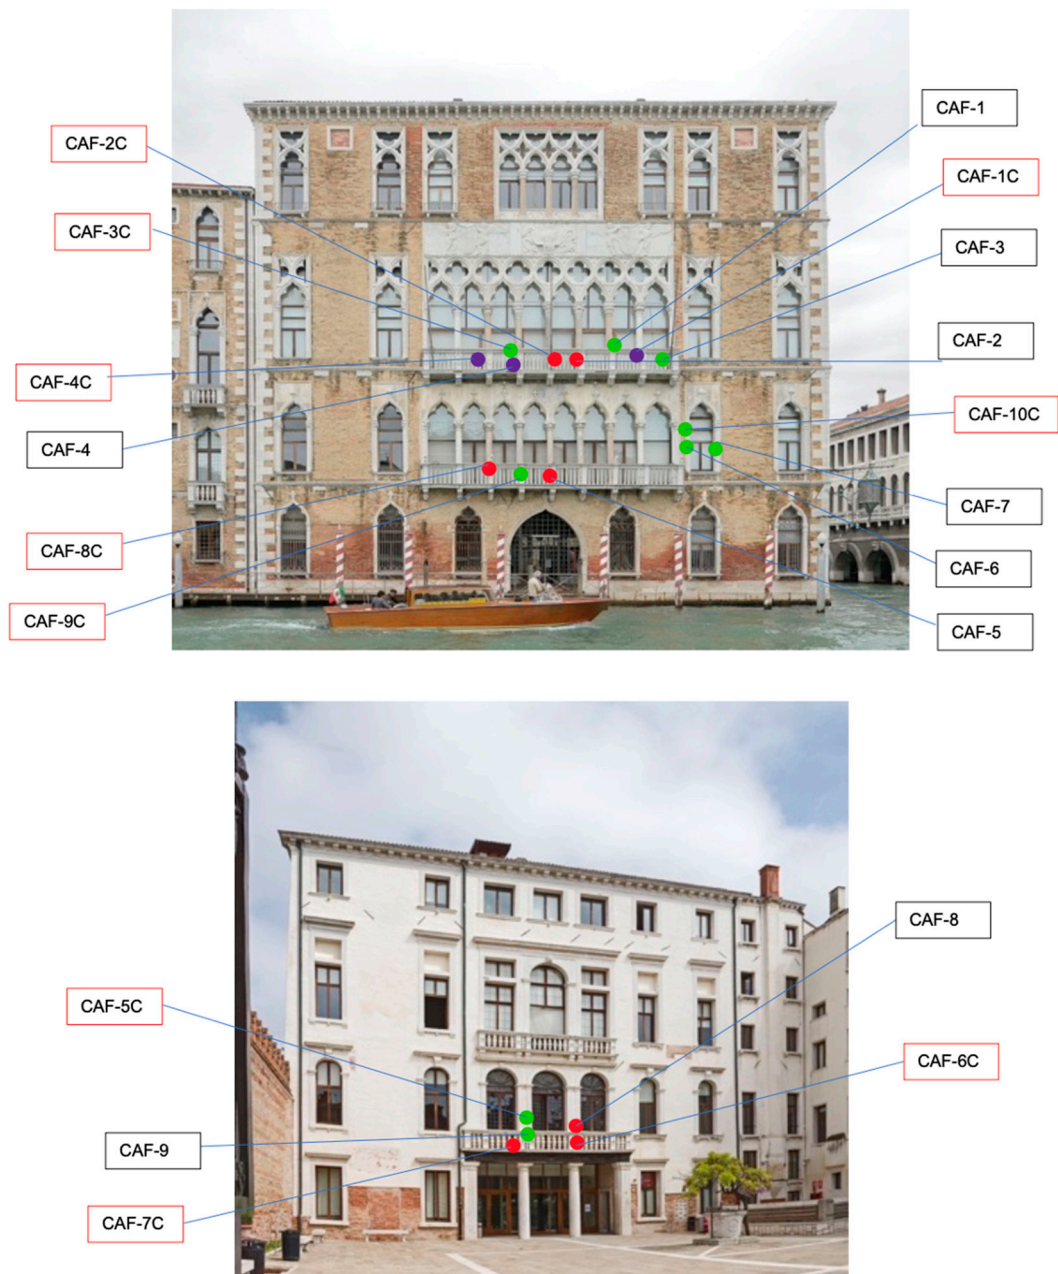

Figure S3: Sampling points on Ca' Foscari façade on canals and internal courtyard



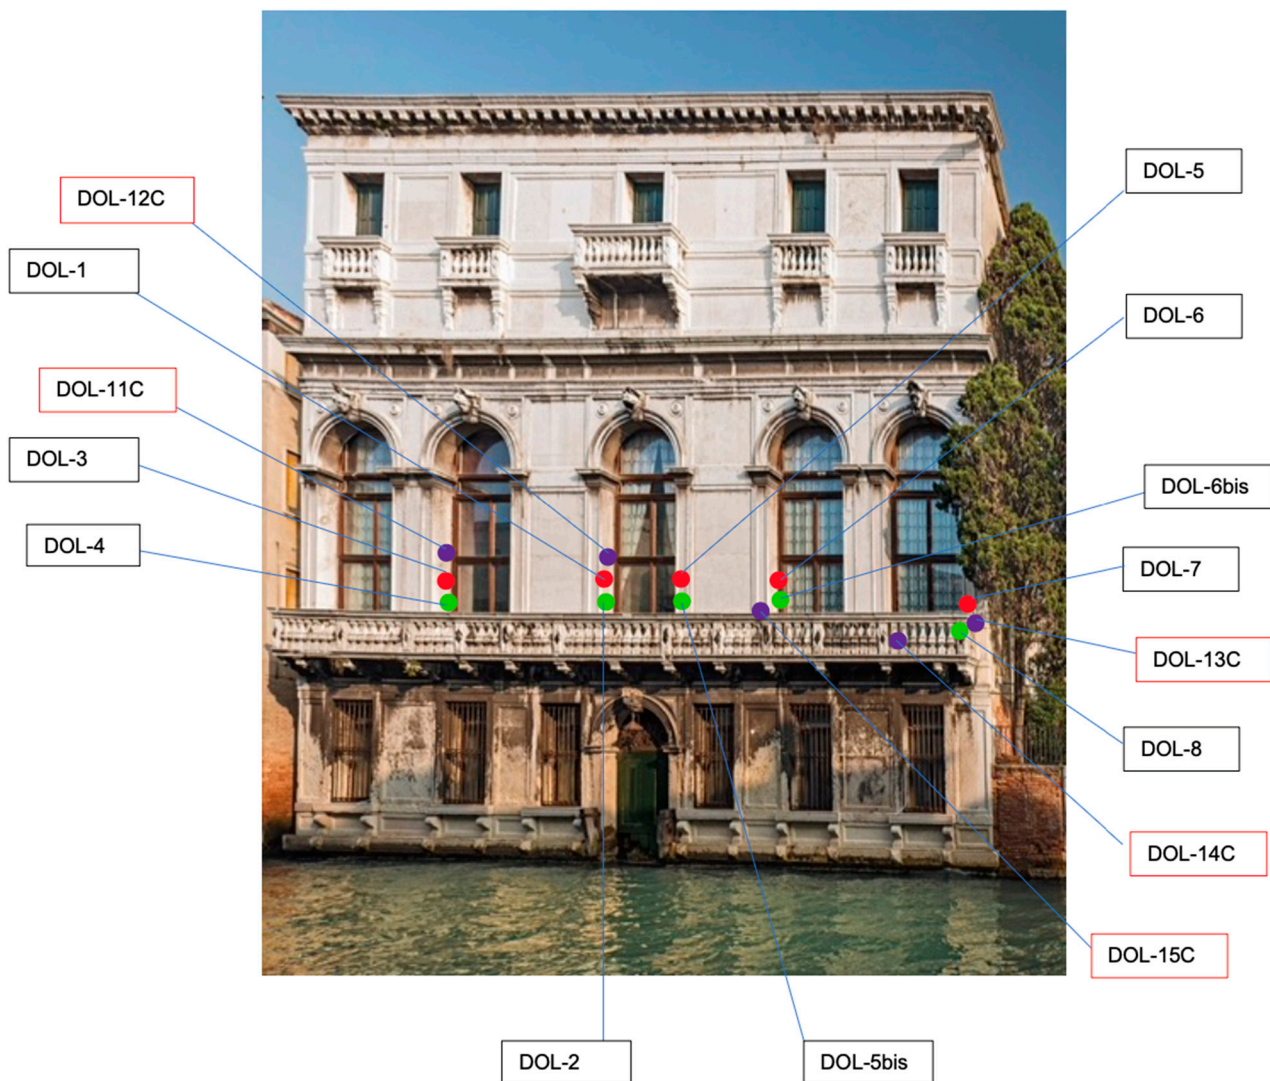

Figure S4: Sampling points on Ca' Dolfin façade on the canal

Table S1: 8-bit scan of 5x5 cm<sup>2</sup> moulds and surface plots for Garzoni Palace, Ca' Foscari, Ca' Dolfin in 2015 and 2020.

| <b>Garzoni Palace on the first floor of the canal façade</b>  |             |                 |                                                                                     |                                                                                      |
|---------------------------------------------------------------|-------------|-----------------|-------------------------------------------------------------------------------------|--------------------------------------------------------------------------------------|
| <b>YEAR</b>                                                   | <b>NAME</b> | <b>Esposure</b> | <b>Immages 8 bit invert</b>                                                         | <b>Surface Plot</b>                                                                  |
| 2020                                                          | GAR-1C      | S               | 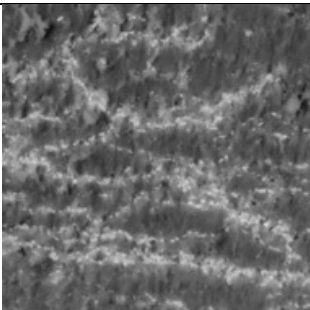   |    |
| 2020                                                          | GAR-2C      | E               |    |    |
| <b>Garzoni Palace on the second floor of the canal façade</b> |             |                 |                                                                                     |                                                                                      |
| <b>YEAR</b>                                                   | <b>NAME</b> | <b>exposure</b> | <b>Immages 8bit invert</b>                                                          | <b>Surface Plot</b>                                                                  |
| 2020                                                          | GAR-3C      | S               |  |  |
| 2020                                                          | GAR-4C      | E               |  |  |
| 2020                                                          | GAR-5C      | S               |  |  |

| 2020                                                         | GAR-6C | E           | 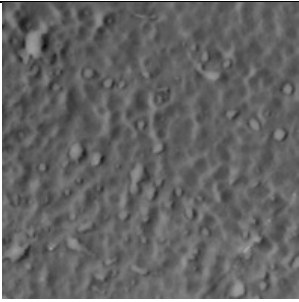   |    |
|--------------------------------------------------------------|--------|-------------|-------------------------------------------------------------------------------------|--------------------------------------------------------------------------------------|
| <b>Garzoni Palace on the third floor of the canal façade</b> |        |             |                                                                                     |                                                                                      |
| YEAR                                                         | NAME   | EXPOSIT ION | Immages 8bit invert                                                                 | Surface Plot                                                                         |
| 2020                                                         | GAR-7C | S           |    |    |
| 2020                                                         | GAR-8C | E           |   |   |
| <b>Ca' Foscari on the second floor of the canal façade</b>   |        |             |                                                                                     |                                                                                      |
| YEARS                                                        | NAME   | EXPOSITIO N | Immages 8bit invert                                                                 | Surface Plot                                                                         |
| 2020                                                         | CF-1C  | E           |  |  |

|      |       |   |                                                                                     |                                                                                      |
|------|-------|---|-------------------------------------------------------------------------------------|--------------------------------------------------------------------------------------|
| 2015 | CF-1C | E | 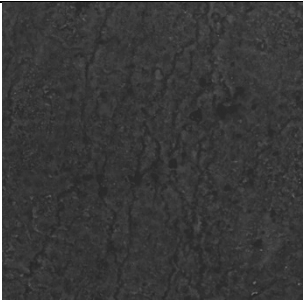   |    |
| 2020 | CF-2C | S |    |    |
| 2015 | CF-2C | S |   |   |
| 2020 | CF-3C | E |  |  |
| 2015 | CF-3C | E |  |  |

|      |       |   |                                                                                   |                                                                                    |
|------|-------|---|-----------------------------------------------------------------------------------|------------------------------------------------------------------------------------|
| 2020 | CF-4C | E | 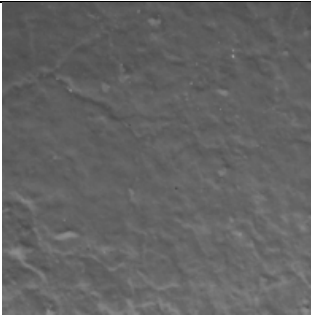 |  |
| 2015 | CF-4C | E |  |  |

### Ca' Foscari on the first floor of the canal façade

| YEARS | NAME  | EXPOSITIO<br>N | Immages 8bit invert                                                                 | Surface Plot                                                                         |
|-------|-------|----------------|-------------------------------------------------------------------------------------|--------------------------------------------------------------------------------------|
| 2020  | CF-8C | S              | 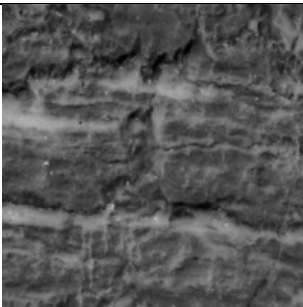 |  |
| 2015  | CF-8C | S              |  |  |



| 2020                                                          | CF-9C  | E        | 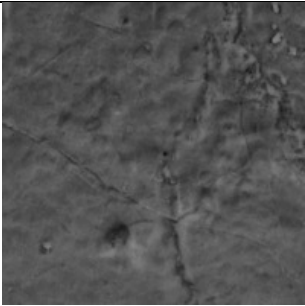   |    |
|---------------------------------------------------------------|--------|----------|-------------------------------------------------------------------------------------|--------------------------------------------------------------------------------------|
| 2020                                                          | CF-9C  | E        |    |    |
| 2020                                                          | CF-10C | E        |   |   |
| 2015                                                          | CF-10C | E        |  |  |
| <b>Ca' Foscari on the first floor of the courtyard facade</b> |        |          |                                                                                     |                                                                                      |
| YEAR                                                          | NAME   | exposure | Immages 8bit invert                                                                 | Surface Plot                                                                         |
| 2020                                                          | CF-5C  | E        |  |  |

|                                                              |             |             |                                                                                     |                                                                                      |
|--------------------------------------------------------------|-------------|-------------|-------------------------------------------------------------------------------------|--------------------------------------------------------------------------------------|
| 2015                                                         | CF-5C       | E           | 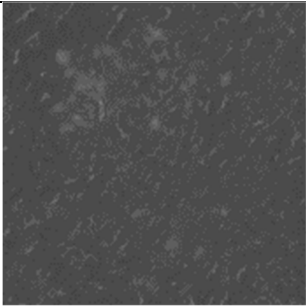   |    |
| 2020                                                         | CF-6C       | S           |    |    |
| 2015                                                         | CF-6C       | S           |   |   |
| 2020                                                         | CF-7C       | S           |  |  |
| <b>Ca' Dolfin on the first floor of the courtyard facade</b> |             |             |                                                                                     |                                                                                      |
| <b>YEARS</b>                                                 | <b>NOME</b> | <b>TIPO</b> | <b>Immagine 8bit invert</b>                                                         | <b>Surface Plot</b>                                                                  |
| 2020                                                         | DOL-11C     | S           |  |  |

|      |         |   |                                                                                     |                                                                                      |
|------|---------|---|-------------------------------------------------------------------------------------|--------------------------------------------------------------------------------------|
| 2015 | DOL-11C | S | 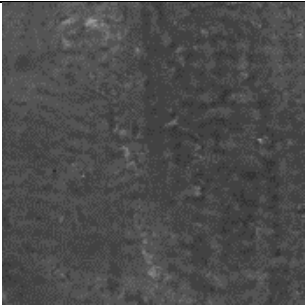   |    |
| 2020 | DOL-12C | S |    |    |
| 2015 | DOL-12C | S |   |   |
| 2020 | DOL-13C | E |  |  |
| 2015 | DOL-13C | E |  |  |

|      |         |   |                                                                                     |                                                                                      |
|------|---------|---|-------------------------------------------------------------------------------------|--------------------------------------------------------------------------------------|
| 2020 | DOL-14C | S | 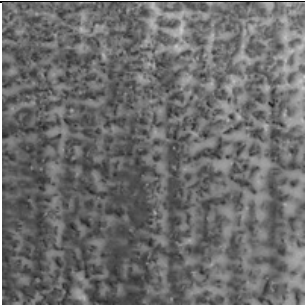   |    |
| 2015 | DOL-14C | S |    |    |
| 2020 | DOL-15C | E |   |   |
| 2015 | DOL-15C | E |  |  |
